# Supplementary material
Source: PubMed Central journal article supplement (PMC5178975)

# Supplemental Figure 1

## Cx37CT

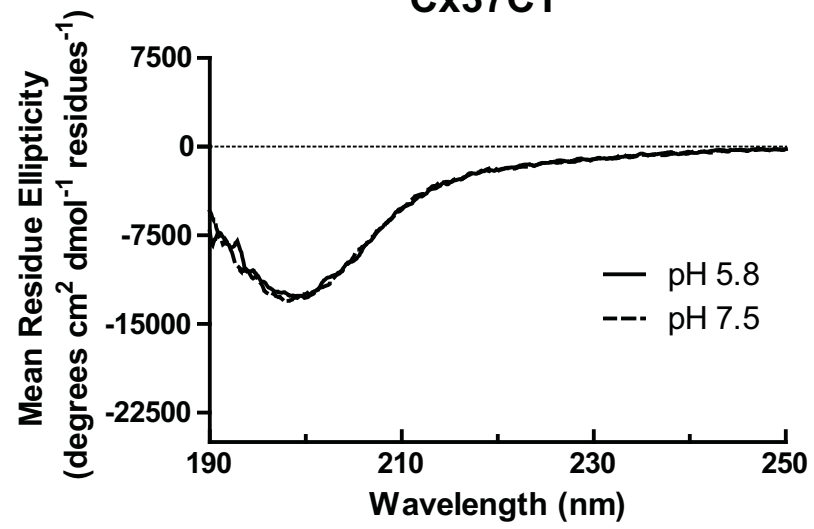

## Cx40CT

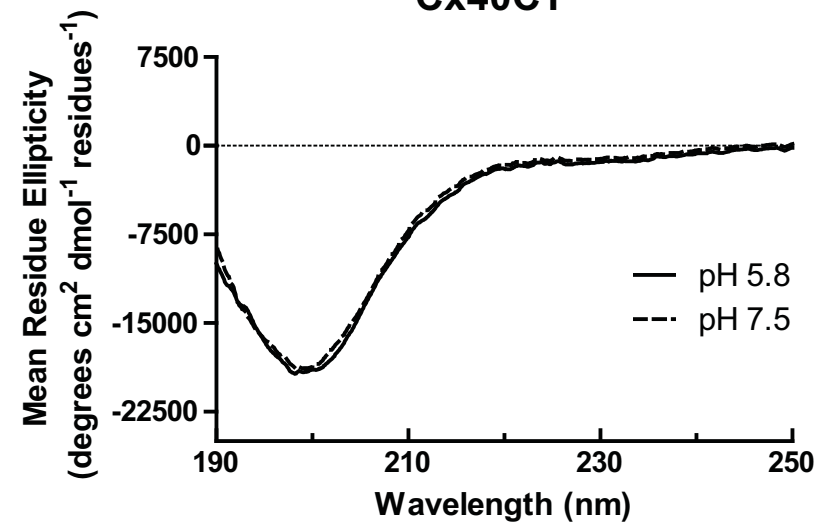

## Cx43CT

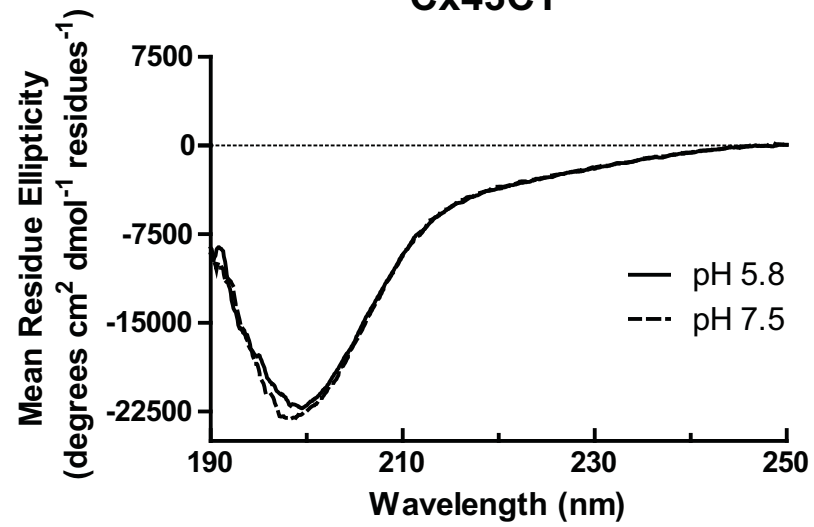

## Cx45CT

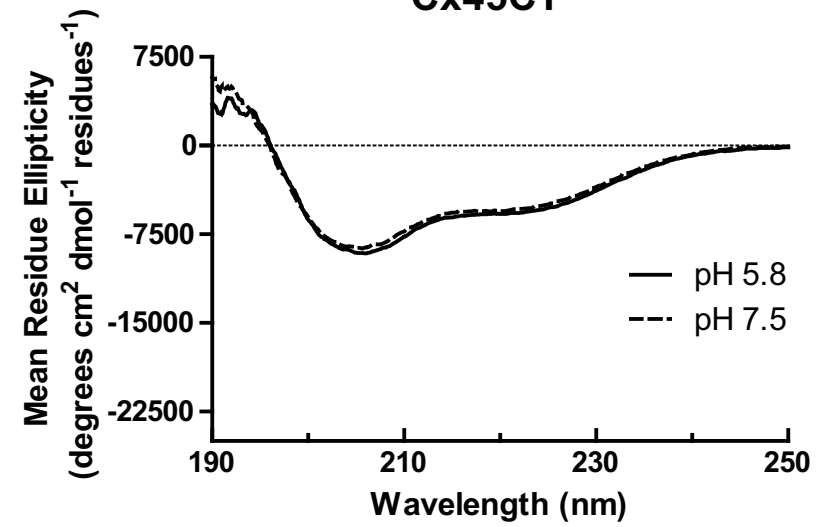

Supplement: NIHMS836233-supplement-Supllemental_Figure_1.pdf [file NIHMS836233-supplement-Supllemental_Figure_1.pdf]

# Supplemental Figure 3

## A

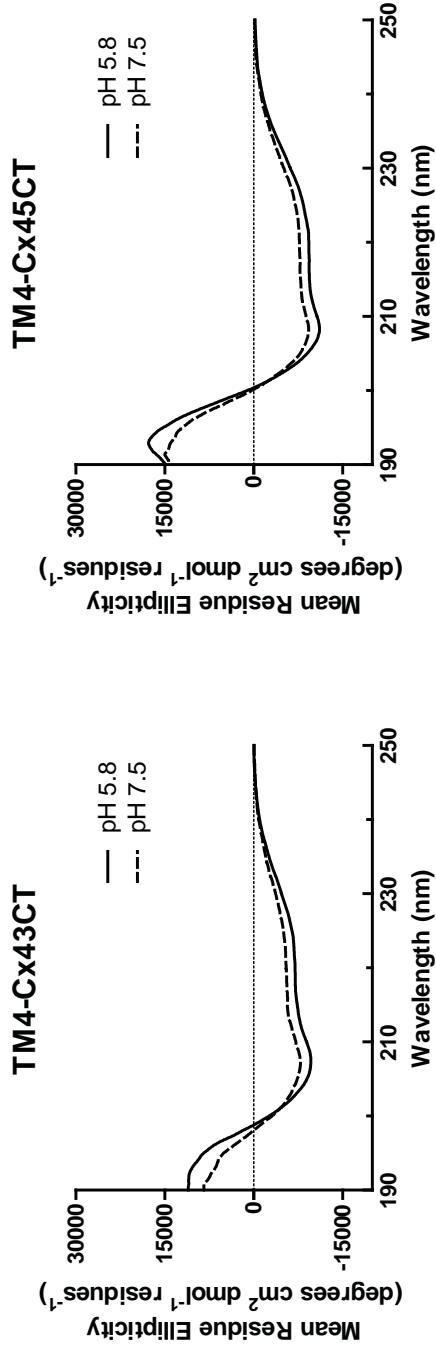

## B

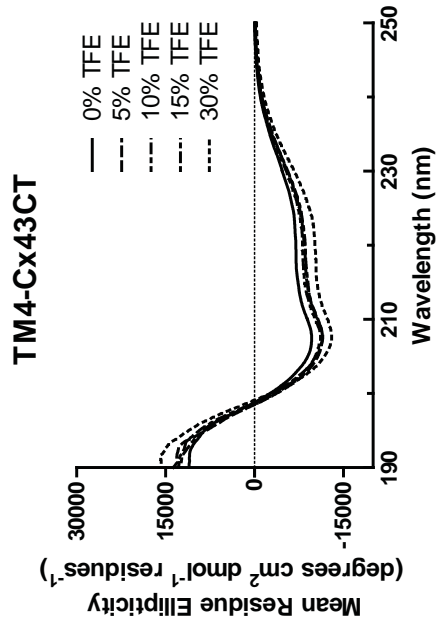

Supplement: NIHMS836233-supplement-Supllemental_Figure_3.pdf [file NIHMS836233-supplement-Supllemental_Figure_3.pdf]

# Supplemental Figure 2

## A

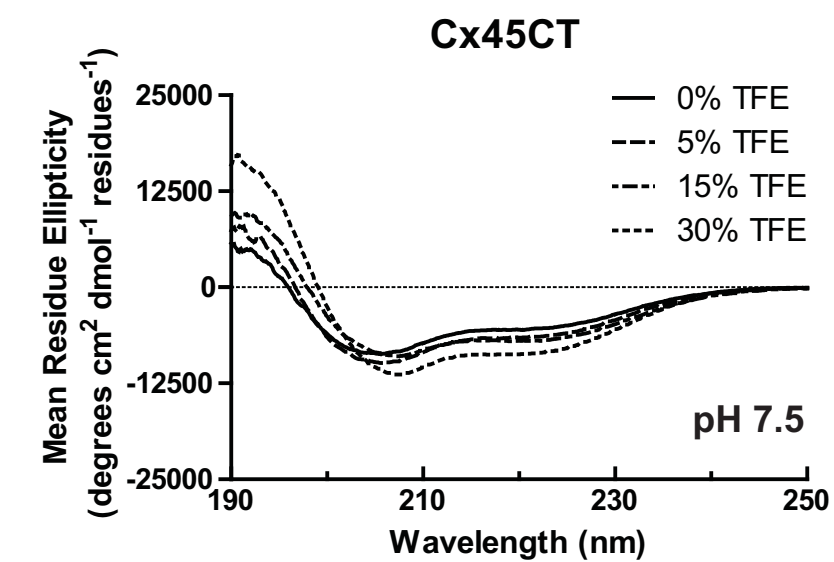

## B

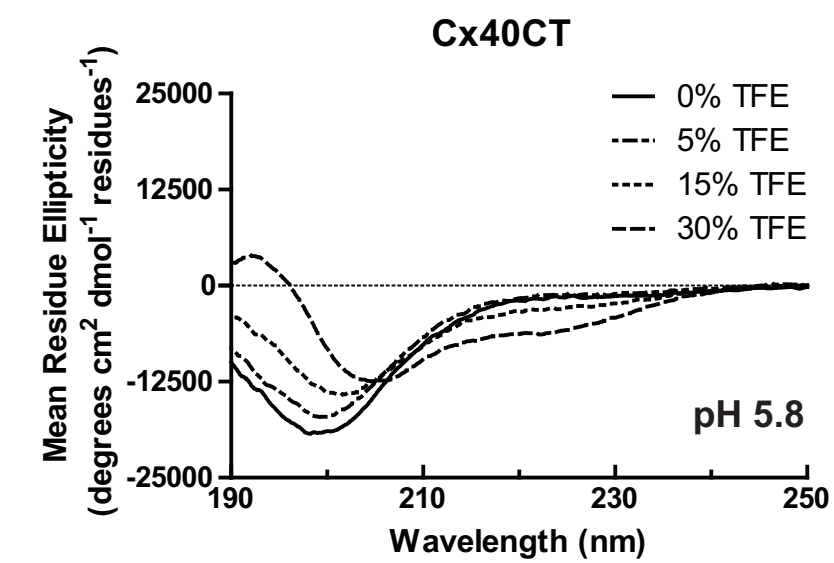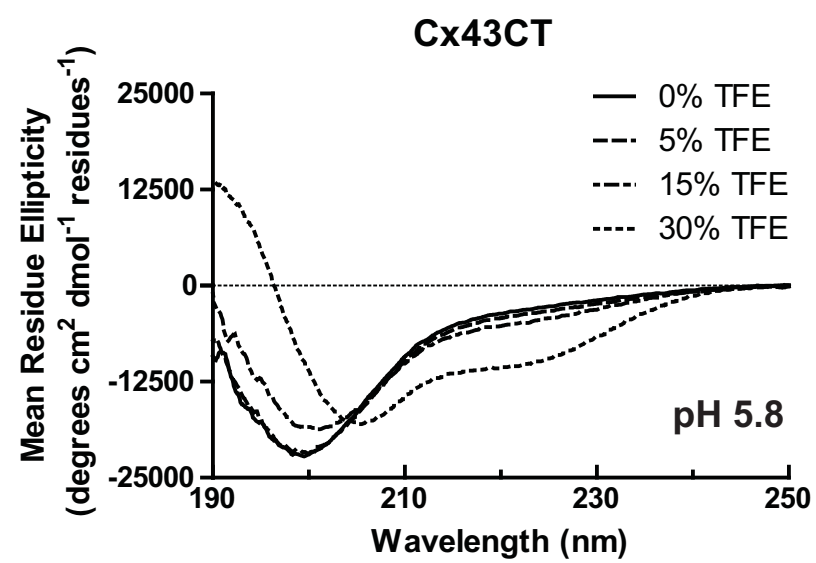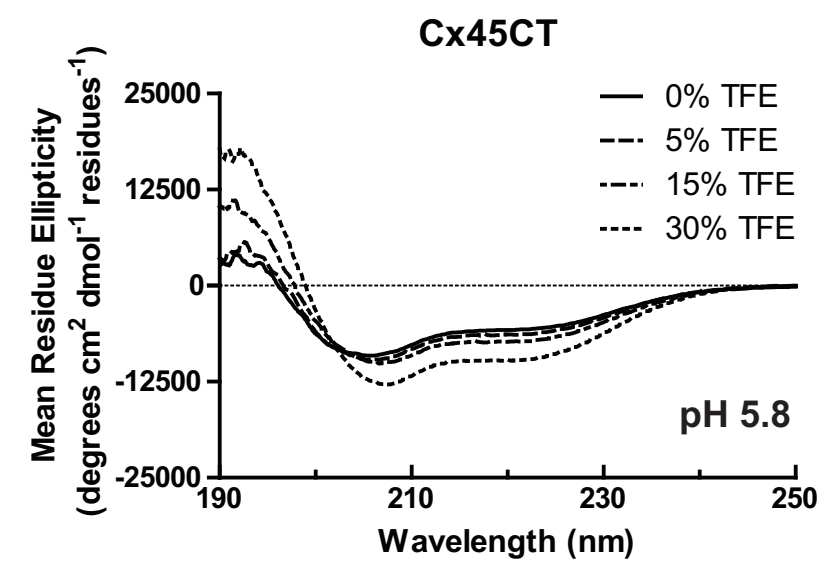

Supplement: NIHMS836233-supplement-Supplemental_Figure_2.pdf [file NIHMS836233-supplement-Supplemental_Figure_2.pdf]

# Supplemental Figure 4

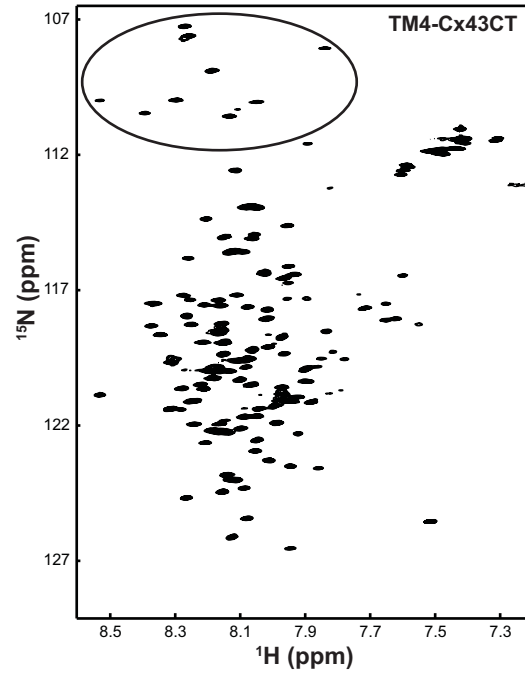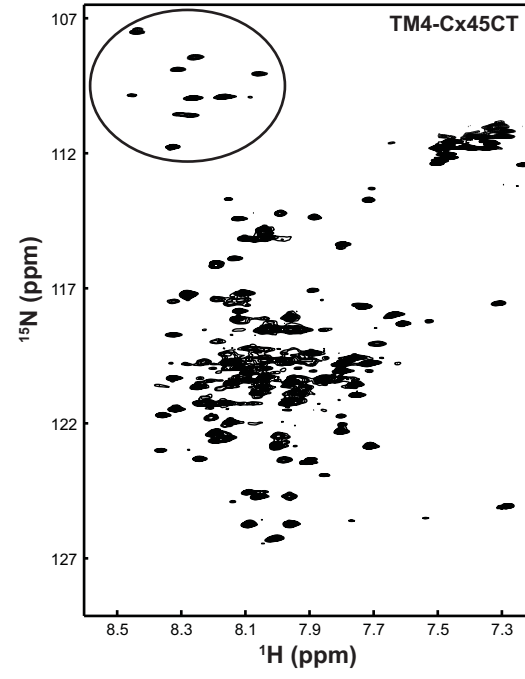

Supplement: NIHMS836233-supplement-Supplemental_Figure_4.pdf [file NIHMS836233-supplement-Supplemental_Figure_4.pdf]
